# Supplementary material for: Monodisperse embedded nanoparticles derived from an atomic metal-dispersed precursor of layered double hydroxide for architectured carbon nanotube formation
Source: Royal Society of Chemistry journal article supplement (doi:10.1039/c3ta14380e), 2013-11-25
Supplement: c3ta14380e.pdf [file c3ta14380e.pdf]

Electronic supplementary information for

**Monodisperse embedded nanoparticles derived from an  
atomic metal-dispersed precursor of layered double  
hydroxide for architected carbon nanotube formation**

*Gui-Li Tian<sup>a,e</sup>, Meng-Qiang Zhao<sup>a,e</sup>, Bingsen Zhang<sup>b</sup>, Qiang Zhang<sup>a,\*</sup>, Wei Zhang<sup>c,d</sup>,  
Jia-Qi Huang<sup>a</sup>, Tian-Chi Chen<sup>a</sup>, Wei-Zhong Qian<sup>a</sup>, Dang Sheng Su<sup>\*,b,c</sup>, and Fei Wei<sup>\*,a</sup>*

<sup>a</sup> Beijing Key Laboratory of Green Chemical Reaction Engineering and Technology,  
Department of Chemical Engineering, Tsinghua University, Beijing 100084, China

<sup>b</sup> Shenyang National Laboratory for Materials Science, Institute of Metal Research,  
Chinese Academy of Sciences, 72 Wenhua Road, Shenyang 110016, China

<sup>c</sup> Department of Inorganic Chemistry, Fritz Haber Institute of the Max Planck Society,  
Faradayweg 4-6, 14195 Berlin, Germany

<sup>d</sup> Department of Energy Conversion and Storage, Technical University of Denmark,  
Risø campus, Frederiksborgvej 399, 4000 Roskilde, Denmark

<sup>e</sup> These authors contributed equally.

**Corresponding Authors**

\* Correspondence should be addressed to: zhang-qiang@mails.tsinghua.edu.cn (Q. Zhang); dangsheng@fhi-berlin.mpg.de (D. S. Su); wf-dce@tsinghua.edu.cn (F. Wei)

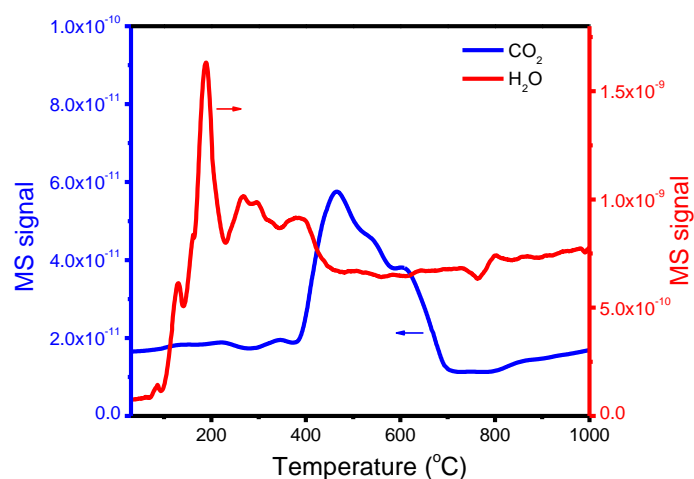

**Fig. S1.** MS spectra of H<sub>2</sub>O and CO<sub>2</sub> as a function of temperature during the *in situ* calcination of FeMgAl LDH-IV.

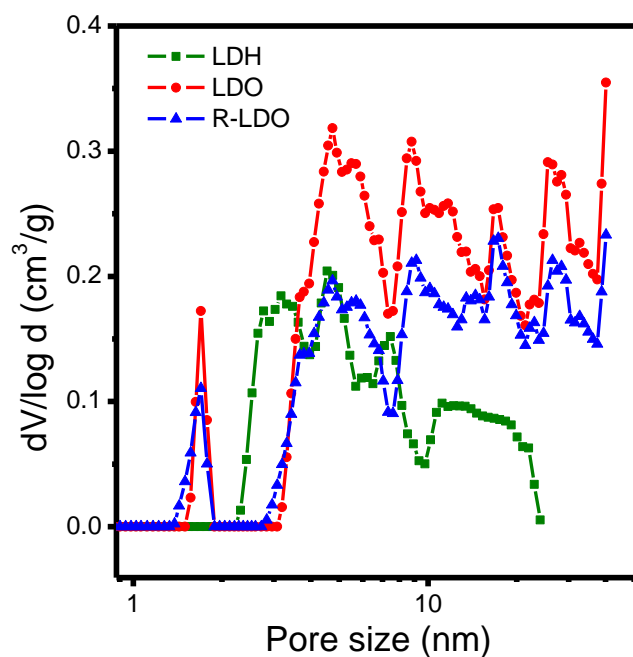

**Fig. S2.** The pore size distribution of LDH-IV, the corresponding LDOs, and the reduced LDOs. The calcination and reduction were carried out at 750 °C for 30 min under Ar and H<sub>2</sub> atmosphere respectively.
